# Supplementary material
Source: publisher figshare collection journal article supplement (https://wiley.figshare.com/ndownloader/files/18606752)
Supplement: Supplementary file 1 [file 18606752]

## Sheet: Figure 2
Figure 2
site	Distance	time	Total	Mortality	Mortperc	Surv	X.Survival
1	87.2	PreRem	26	24	92.3077	2	9.67742
1	87.2	PreRem	26	22	84.6154	4	19.3548
1	87.2	PreRem	26	26	100	0	0
2	135	PreRem	26	8	30.7692	18	87.0968
2	135	PreRem	26	26	100	0	0
2	135	PreRem	26	24	92.3077	2	9.67742
3	198	PreRem	26	16	61.5385	10	48.3871
3	198	PreRem	26	22	84.6154	4	19.3548
3	198	PreRem	26	12	46.1538	14	67.7419
Control	400	PreRem	26	4	15.3846	22	106.452
Control	400	PreRem	26	6	23.0769	20	96.7742
Control	400	PreRem	26	8	30.7692	18	87.0968
Control	400	PreRem	26	2	7.69231	24	116.129
Control	400	PreRem	26	8	30.7692	18	87.0968
1	87.2	PostRem	26	8	30.7692	18	106.452
1	87.2	PostRem	26	6	23.0769	20	105.882
1	87.2	PostRem	26	8	30.7692	18	117.647
2	135	PostRem	26	3	11.5385	23	105.882
2	135	PostRem	26	7	26.9231	19	135.294
2	135	PostRem	26	4	15.3846	22	111.765
3	198	PostRem	26	16	61.5385	10	129.412
3	198	PostRem	26	13	50	13	58.8235
3	198	PostRem	26	4	15.3846	22	76.4706
Control	400	PostRem	26	3	11.5385	23	135.294
Control	400	PostRem	26	8	30.7692	18	105.882

## Sheet: Figure 3
Figure 3A								Figure 3B
Site	Distance	Time	Pot Offsp	Total	XControl	PotPerc		site	Distance	time	Total	Offspring	Offspringperc
1	87.2	PreRemediation	0	100	0	0		1	87.2	PreRem	100	0	0
1	87.2	PreRemediation	0	100	0	0		1	87.2	PreRem	100	0	0
1	87.2	PreRemediation	0	100	0	0		1	87.2	PreRem	100	0	0
2	135	PreRemediation	52	100	59.3607	59.3607		2	135	PreRem	100	4	12.5
2	135	PreRemediation	1	100	1.14155	1.14155		2	135	PreRem	100	1	3.125
2	135	PreRemediation	1	100	1.14155	1.14155		2	135	PreRem	100	1	3.125
3	198	PreRemediation	84	100	95.8904	95.8904		3	198	PreRem	100	20	62.5
3	198	PreRemediation	50	100	57.0776	57.0776		3	198	PreRem	100	0	0
Control	600	PreRemediation	94	100	107.306	107.306		3	198	PreRem	100	2	6.25
Control	600	PreRemediation	96	100	109.589	109.589		Control	400	PreRem	100	30	93.75
Control	600	PreRemediation	156	100	178.082	178.082		Control	400	PreRem	100	32	100
Control	600	PreRemediation	60	100	68.4932	68.4932		Control	400	PreRem	100	44	137.5
1	87.2	PostRemediation	18	100	1.66205	12.0805		Control	400	PreRem	100	32	100
1	87.2	PostRemediation	0	100	14.9584	0		Control	400	PreRem	100	28	68.75
1	87.2	PostRemediation	19	100	0	12.7517		1	87.2	PostRem	100	2	12.7421
2	135	PostRemediation	8	100	15.7895	5.36913		1	87.2	PostRem	100	2	12.7421
2	135	PostRemediation	0	100	6.6482	0		1	87.2	PostRem	100	0	0
2	135	PostRemediation	32	100	0	21.4765		2	135	PostRem	100	3	19.1131
3	198	PostRemediation	16	100	26.5928	10.7383		2	135	PostRem	100	8	50.9684
3	198	PostRemediation	2	100	13.2964	1.34228		2	135	PostRem	100	0	0
3	198	PostRemediation	63	100	1.66205	42.2819		3	198	PostRem	100	0	0
Control	600	PostRemediation	176	100	52.3546	118.121		3	198	PostRem	100	0	0
Control	600	PostRemediation	122	100	146.26	81.8792		3	198	PostRem	100	2	12.7421
								Control	400	PostRem	100	15	95.5657
								Control	400	PostRem	100	32	203.874
								Control	400	PostRem	100	42	267.584

## Sheet: Figure 4
Figure 4
Conc	Total	Nauplii final	Copepodite final	% Copepodites	% Control	Surv%	SurvControl%
ControlB	62	22	40	49.3827	78.4314	76.5432	76.5432
ControlB	100	40	60	74.0741	117.647	123.457	123.457
ControlB	81	28	53	65.4321	103.922	100	100
Site 3B	27	2	25	30.8642	49.0196	33.3333	33.3333
Site 3B	70	2	68	83.9506	133.333	86.4198	86.4198
Site 2B	35	1	34	41.9753	66.6667	43.2099	43.2099
Site 2B	92	7	85	104.93	166.6	113.58	113.58
Site 1B	81	0	0	0	0	0	0
Site 1B	81	0	0	0	0	0	0
ControlA	54	10	44	77.193	107.317	94.7368	105.882
ControlA	60	14	46	80.7018	112.195	105.263	117.647
ControlA	39	6	33	57.8947	80.4878	68.4211	76.4706
Site 3A	54	16	38	66.6667	92.6829	94.7368	105.882
Site 3A	64	9	55	96.4912	134.146	112.281	125.49
Site 2A	48	10	38	66.6667	92.6829	84.2105	94.1176
Site 2A	61	17	44	77.193	107.317	107.018	119.608
Site 2A	41	11	30	52.6316	73.1707	71.9298	80.3922
Site 1A	76	36	40	70.1754	97.561	133.333	149.02
Site 1A	45	14	31	54.386	75.6098	78.9474	88.2353
Site 1A	49	21	28	49.1228	68.2927	85.9649	96.0784
Site 1A	39	20	19	33.3333	46.3415	68.4211	76.4706
Site 1A	23	7	16	28.0702	39.0244	40.3509	45.098
Site 1A	33	19	14	24.5614	34.1463	57.8947	64.7059
